# Supplementary material for: Synthesis, crystal structure and optical properties of [Ag(UO2)3(OAc)9][Zn(H2O)4(CH3CH2OH)2]: A novel compound containing closed-shell 3d10, 4d10 and 5d10 metal ions
Source: Royal Society of Chemistry journal article supplement (doi:10.1039/b708799c), 2007-01-01
Supplement: b708799c.pdf [file b708799c.pdf]

## Supplementary material (ESI):

# **Synthesis, Crystal structure and Optical properties of [Ag(UO<sub>2</sub>)<sub>3</sub>(OAc)<sub>9</sub>][Zn(H<sub>2</sub>O)<sub>4</sub>(CH<sub>3</sub>CH<sub>2</sub>OH)<sub>2</sub>]: A Novel Compound Containing Closed-shell 3d<sup>10</sup>, 4d<sup>10</sup> and 5d<sup>10</sup> Metal Ions**

Geng-Geng Luo, Li-Rong Lin, Rong-Bin Huang<sup>\*</sup>, Lan-Sun Zheng

*Department of chemistry, Xiamen University, Xiamen 361005, People's Republic of  
China*

*State key Laboratory for Physical Chemistry of Solid Surfaces, Xiamen University,  
Xiamen 361005, People's Republic of China*

### Electronic Supporting Information

|                                                                                                                                                                       |    |
|-----------------------------------------------------------------------------------------------------------------------------------------------------------------------|----|
| Table of Content .....                                                                                                                                                | 1  |
| 1. Experimental procedures.....                                                                                                                                       | 2  |
| 2. Table S1 to S4: Fractional atomic coordinates, anisotropic thermal parameters,<br>selected bond distances and angles and hydrogen bond geometry for <b>1</b> ..... | 2  |
| 3. Figure S1 and S2: Polyhedral representation and Schematic depiction of crystal<br>packing of <b>1</b> .....                                                        | 6  |
| 4. IR spectra of <b>1</b> (Figure S3) .....                                                                                                                           | 7  |
| 5. <sup>1</sup> H NMR and <sup>13</sup> C NMR of <b>1</b> (Figure S4 & S5).....                                                                                       | 8  |
| 6. Powder XRD patterns of <b>1</b> (Figure S6) ... ..                                                                                                                 | 9  |
| 7. Fluorescence excitation spectra and emission spectra of <b>1</b> in the solid state (Figure<br>S7).....                                                            | 10 |

---

<sup>\*</sup> Correspondence e-mail: rbhuang@xmu.edu.cn

## 1. Experimental Procedures

IR spectra were recorded on a Nicolet AVATAT FT-IR360 spectrometer as KBr pellets in the frequency range 4000-400  $\text{cm}^{-1}$ .  $^1\text{H}$  NMR and  $^{13}\text{C}$  NMR were acquired in  $\text{CDCl}_3$  on Varian Unity<sup>+</sup> 400MHz NMR spectrometer using TMS as an internal standard. Powder X-ray diffraction (PXRD) data were collected on a Philips X'Pert Pro MPD X-ray diffractometer with  $\text{Cu K}\alpha$  radiation equipped with a X'Celerator detector. The elemental analyses (C, H, N contents) were determined on a CE instruments EA 1110 analyzer. The emission of dark-green light from **1** is easily observed when the sample is irradiated with 254 or 356 nm UV light using a handheld UV lamp. Photoluminescence measurements were performed on a Hitachi F-4500 fluorescence spectrophotometer with solid powder on a 1 cm quartz round plate (for emission spectra, excitation wavelength: 365, 424 and 447 nm; emission wavelengths: 400-800 nm; slit width: 2.5 nm; sensitivity: high. for excitation spectra, emission wavelength: 481, 501, 523 and 546 nm; excitation wavelengths: 300-500 nm; slit width: 2.5 nm; sensitivity: high).

## 2. Tables of anisotropic thermal parameters, selected bond distances and angles and hydrogen bond geometry for **1**.

**Table S1.** atomic coordinates ( $\times 10^4$ ) and equivalent isotropic displacement parameters ( $\text{\AA}^2 \times 10^3$ ) for **1**.  $U(\text{eq})$  is defined as one third of the trace of the orthogonalized  $U_{ij}$  tensor.

|     | x       | y       | z        | U(eq) |
|-----|---------|---------|----------|-------|
| Zn1 | 2500    | 7500    | 0000     | 29(1) |
| Ag1 | 5000    | 2508(1) | 2500     | 43(1) |
| U1  | 5000    | 5406(1) | 2500     | 36(1) |
| U2  | 6470(2) | 846(1)  | 2541(3)  | 33(1) |
| C1  | 7490(6) | -313(8) | 2587(9)  | 36(3) |
| C2  | 8052(8) | -886(1) | 2635(15) | 80(6) |
| C3  | 6122(6) | 746(9)  | 3986(9)  | 40(3) |
| C4  | 5910(8) | 685(12) | 4704(12) | 70(5) |

|     |         |          |          |       |
|-----|---------|----------|----------|-------|
| C5  | 5770(6) | 2185(9)  | 1048(9)  | 46(3) |
| C6  | 5430(8) | 2904(12) | 312(13)  | 79(5) |
| C7  | 6134(6) | 4351(10) | 3853(10) | 50(3) |
| C8  | 6706(8) | 3817(11) | 4569(12) | 76(5) |
| C9  | 5000    | 7429(12) | 2500     | 43(5) |
| C10 | 5000    | 8509(13) | 2500     | 67(6) |
| C11 | 3104(7) | 7071(10) | 2173(10) | 56(4) |
| C12 | 3584(8) | 7387(13) | 3135(10) | 69(5) |
| O1  | 5856(4) | -3(6)    | 1904(7)  | 50(2) |
| O2  | 7078(4) | 1713(6)  | 3176(6)  | 48(2) |
| O3  | 5881(5) | 1348(6)  | 3343(8)  | 59(3) |
| O4  | 6552(4) | 185(6)   | 4007(6)  | 45(2) |
| O5  | 7368(4) | -341(6)  | 3245(6)  | 45(2) |
| O6  | 7120(4) | 204(6)   | 1862(7)  | 49(2) |
| O7  | 6226(4) | 1654(6)  | 1069(6)  | 48(2) |
| O8  | 5645(4) | 2093(6)  | 1693(7)  | 52(2) |
| O9  | 6149(4) | 5247(6)  | 3869(7)  | 55(2) |
| O10 | 5619(4) | 3951(6)  | 3240(8)  | 58(3) |
| O11 | 4691(4) | 5411(6)  | 3280(7)  | 58(3) |
| O12 | 5517(4) | 6986(6)  | 3060(6)  | 44(2) |
| O13 | 3197(4) | 7476(6)  | 1464(6)  | 39(2) |
| O1W | 3134(4) | 8508(6)  | -39(6)   | 48(2) |
| O2W | 1975(4) | 8531(5)  | 260(6)   | 39(2) |

**Table S2** Selected bond lengths (Å) and angles (°) for **1**

|                                 |          |                                              |          |                          |          |
|---------------------------------|----------|----------------------------------------------|----------|--------------------------|----------|
| Ag(1)-O(3)                      | 2.412(9) | Ag(1)-O(3) <sup>ii</sup>                     | 2.412(9) | Ag(1)-O(10)              | 2.414(9) |
| Ag(1)-O(10) <sup>ii</sup>       | 2.414(9) | Ag(1)-O(8)                                   | 2.483(8) | Ag(1)-O(8) <sup>ii</sup> | 2.483(8) |
| U(1)-O(11)                      | 1.732(9) | U(1)-O(11) <sup>ii</sup>                     | 1.732(9) | U(1)-O(10)               | 2.427(8) |
| U(1)-O(10) <sup>ii</sup>        | 2.427(8) | U(1)-O(12)                                   | 2.455(8) | U(1)-O(12) <sup>ii</sup> | 2.455(8) |
| U(1)-O(9)                       | 2.467(8) | U(1)-O(9) <sup>ii</sup>                      | 2.467(8) | U(2)-O(1)                | 1.734(9) |
| U(2)-O(2)                       | 1.743(8) | U(2)-O(3)                                    | 2.402(8) | U(2)-O(6)                | 2.423(8) |
| U(2)-O(8)                       | 2.432(8) | U(2)-O(5)                                    | 2.439(7) | U(2)-O(7)                | 2.440(8) |
| U(2)-O(4)                       | 2.473(8) | Zn(1)-O(13)                                  | 2.101(8) | Zn(1)-O(13) <sup>i</sup> | 2.101(8) |
| Zn(1)-O(1w)                     | 2.047(7) | Zn(1)-O(1w) <sup>i</sup>                     | 2.047(7) | Zn(1)-O(2w)              | 2.051(7) |
| Zn(1)-O(2w) <sup>i</sup>        | 2.051(7) |                                              |          |                          |          |
| O(3)-Ag(1)-O(3) <sup>ii</sup>   | 95.6(5)  | O(10)-Ag(1)-O(3) <sup>ii</sup>               | 164.1(3) |                          |          |
| O(3)-Ag(1)-O(10)                | 99.3(3)  | O(3)-Ag(1)-O(10) <sup>ii</sup>               | 164.1(3) |                          |          |
| O(10)-Ag(1)-O(10) <sup>ii</sup> | 66.6(4)  | O(3) <sup>ii</sup> -Ag(1)-O(8)               | 95.4(3)  |                          |          |
| O(3)-Ag(1)-O(8)                 | 66.0(3)  | O(10)-Ag(1)-O(8)                             | 95.8(3)  |                          |          |
| O(10) <sup>ii</sup> -Ag(1)-O(8) | 106.8(3) | O(3) <sup>ii</sup> -Ag(1)-O(8) <sup>ii</sup> | 66.0(3)  |                          |          |

## Electronic Supplementary Information for Dalton Transactions

This journal is © The Royal Society of Chemistry 2007

|                                               |          |                                               |            |
|-----------------------------------------------|----------|-----------------------------------------------|------------|
| O(3)-Ag(1)-O(8) <sup>ii</sup>                 | 95.4(3)  | O(10) <sup>ii</sup> -Ag(1)-O(8)               | 106.8(3)   |
| O(10) <sup>ii</sup> -Ag(1)-O(8) <sup>ii</sup> | 95.8(3)  | O(10)-Ag(1)-O(8) <sup>ii</sup>                | 106.8(3)   |
| O(10) <sup>ii</sup> -Ag(1)-O(8) <sup>ii</sup> | 95.7(3)  | O(8)-Ag(1)-O(8) <sup>ii</sup>                 | 153.0(4)   |
| O(11) <sup>ii</sup> -U(1)-O(11)               | 179.5(6) | O(11) <sup>ii</sup> -U(1)-O(10) <sup>ii</sup> | 89.6(4)    |
| O(11)-U(1)-O(10) <sup>ii</sup>                | 90.8(4)  | O(11) <sup>ii</sup> -U(1)-O(10)               | 90.8(4)    |
| O(11)-U(1)-O(10)                              | 89.6(4)  | O(10) <sup>ii</sup> -U(1)-O(10)               | 66.2(4)    |
| O(11) <sup>ii</sup> -U(1)-O(12)               | 88.2(4)  | O(11)-U(1)-O(12)                              | 91.3(4)    |
| O(10) <sup>ii</sup> -U(1)-O(12)               | 172.5(3) | O(10)-U(1)-O(12)                              | 121.0(3)   |
| O(11) <sup>ii</sup> -U(1)-O(12) <sup>ii</sup> | 91.3(4)  | O(11)-U(1)-O(12) <sup>ii</sup>                | 88.3(4)    |
| O(10) <sup>ii</sup> -U(1)-O(12) <sup>ii</sup> | 121.0(3) | O(10)-U(1)-O(12) <sup>ii</sup>                | 172.5(3)   |
| O(12)-U(1)-O(12) <sup>ii</sup>                | 51.9(4)  | O(11) <sup>ii</sup> -U(1)-O(9) <sup>ii</sup>  | 89.1(4)    |
| O(11)-U(1)-O(9) <sup>ii</sup>                 | 91.0(4)  | O(10) <sup>ii</sup> -U(1)-O(9) <sup>ii</sup>  | 51.7(3)    |
| O(10)-U(1)-O(9) <sup>ii</sup>                 | 117.9(3) | O(12)-U(1)-O(9) <sup>ii</sup>                 | 121.0(3)   |
| O(12) <sup>ii</sup> -U(1)-O(9) <sup>ii</sup>  | 69.3(3)  | O(11) <sup>ii</sup> -U(1)-O(9)                | 91.0(4)    |
| O(11)-U(1)-O(9)                               | 89.1(4)  | O(10) <sup>ii</sup> -U(1)-O(9)                | 117.9(3)   |
| O(10)-U(1)-O(9)                               | 51.7(3)  | O(12)-U(1)-O(9)                               | 69.3(3)    |
| O(12) <sup>ii</sup> -U(1)-O(9)                | 121.0(3) | O(9) <sup>ii</sup> -U(1)-O(9)                 | 169.7(4)   |
| O(1)-U(2)-O(2)                                | 179.1(4) | O(1)-U(2)-O(3)                                | 90.8(4)    |
| O(2)-U(2)-O(3)                                | 88.6(4)  | O(1)-U(2)-O(6)                                | 88.6(3)    |
| O(2)-U(2)-O(6)                                | 92.0(3)  | O(3)-U(2)-O(6)                                | 173.7(3)   |
| O(1)-U(2)-O(8)                                | 89.0(4)  | O(2)-U(2)-O(8)                                | 90.2(4)    |
| O(3)-U(2)-O(8)                                | 67.0(3)  | O(6)-U(2)-O(8)                                | 119.3(3)   |
| O(1)-U(2)-O(5)                                | 93.4(4)  | O(2)-U(2)-O(5)                                | 87.5(3)    |
| O(3)-U(2)-O(5)                                | 121.0(3) | O(6)-U(2)-O(5)                                | 52.8(3)    |
| O(8)-U(2)-O(5)                                | 171.6(3) | O(1)-U(2)-O(7)                                | 90.6(4)    |
| O(2)-U(2)-O(7)                                | 89.0(4)  | O(3)-U(2)-O(7)                                | 118.6(3)   |
| O(6)-U(2)-O(7)                                | 67.6(3)  | O(8)-U(2)-O(7)                                | 51.7(3)    |
| O(5)-U(2)-O(7)                                | 120.1(3) | O(1)-U(2)-O(4)                                | 88.1(4)    |
| O(2)-U(2)-O(4)                                | 92.0(4)  | O(3)-U(2)-O(4)                                | 51.6(3)    |
| O(6)-U(2)-O(4)                                | 122.1(3) | O(8)-U(2)-O(4)                                | 118.5(3)   |
| O(5)-U(2)-O(4)                                | 69.7(3)  | O(7)-U(2)-O(4)                                | 170.1(3)   |
| U(2)-O(8)-Ag(1)                               | 111.6(3) | Ag(1)-O(10)-U(1)                              | 113.6(4)   |
| C(11)-O(13)-Zn(1)                             | 126.7(7) | O(1w)-Zn(1)-O(1w) <sup>i</sup>                | 180.000(1) |
| O(1w) <sup>i</sup> -Zn(1)-O(2w)               | 88.8(3)  | O(1w) <sup>i</sup> -Zn(1)-O(2w) <sup>i</sup>  | 91.2(3)    |
| O(1w)-Zn(1)-O(2w)                             | 91.2(3)  | O(1w)-Zn(1)-O(2w) <sup>i</sup>                | 88.8(3)    |
| O(2w) <sup>i</sup> -Zn(1)-O(2w)               | 180.0(5) | O(1w)-Zn(1)-O(13) <sup>i</sup>                | 96.0(3)    |
| O(1w) <sup>i</sup> -Zn(1)-O(13) <sup>i</sup>  | 83.6(3)  | O(2w) <sup>i</sup> -Zn(1)-O(13) <sup>i</sup>  | 88.4(3)    |
| O(2w)-Zn(1)-O(13) <sup>i</sup>                | 91.6(3)  | O(1w)-Zn(1)-O(13)                             | 84.0(3)    |
| O(1w) <sup>i</sup> -Zn(1)-O(13)               | 96.0(3)  | O(2w) <sup>i</sup> -Zn(1)-O(13)               | 91.6(3)    |
| O(2w)-Zn(1)-O(13)                             | 88.4(3)  | O(13) <sup>i</sup> -Zn(1)-O(13)               | 180.0(4)   |

<sup>a</sup> Symmetry code i, -x+1/2, -y+3/2, -z; ii, -x+1, y, -z+1/2

**Table S3** Hydrogen bond geometry (Å, °) for **1**

| D-H...A                            | D-H  | H...A | D...A     | D-H...A |
|------------------------------------|------|-------|-----------|---------|
| O(13)-H(13B)...O(12) <sup>i</sup>  | 0.82 | 1.96  | 2.733(10) | 158.1   |
| O(1w)-H(1wA)...O(4) <sup>ii</sup>  | 0.82 | 2.36  | 2.759(11) | 110.4   |
| O(1w)-H(1wB)...O(7) <sup>iii</sup> | 0.82 | 1.95  | 2.728(10) | 158.8   |
| O(2w)-H(2wD)...O(9) <sup>iv</sup>  | 0.82 | 2.08  | 2.708(11) | 132.9   |
| O(2w)-H(2wA)...O(5) <sup>ii</sup>  | 0.82 | 1.94  | 2.645(11) | 143.0   |

Symmetry codes: (i), -x+1, y, -z +1/2; (ii), -x+1, y+1, -z+1/2; (iii), -x+1, -y+1, -z; (iv), x-1/2, -y+3/2, z-1/2

**Table S4.** Anisotropic displacement parameters ( $\text{Å}^2 \times 10^3$ ) for **1**. The anisotropic displacement factor exponent takes the form:  $-2 \pi^2 [h^2 a^{*2} U_{11} + \dots + 2 h k a^* b^* U_{12}]$

|       | U11    | U22     | U33     | U23    | U13    | U12    |
|-------|--------|---------|---------|--------|--------|--------|
| Zn(1) | 32(1)  | 25(1)   | 26(1)   | 0(1)   | 11(1)  | 0(1)   |
| Ag(1) | 39(1)  | 25(1)   | 60(1)   | 0      | 23(1)  | 0      |
| U(1)  | 31(1)  | 25(1)   | 37(1)   | 0      | 6(1)   | 0      |
| U(2)  | 36(1)  | 30(1)   | 31(1)   | 8(1)   | 16(1)  | 4(1)   |
| C(1)  | 41(7)  | 35(7)   | 35(7)   | 6(6)   | 22(6)  | -2(5)  |
| C(2)  | 83(12) | 76(11)  | 115(17) | 12(11) | 76(14) | 24(9)  |
| C(3)  | 50(8)  | 45(7)   | 31(7)   | 16(6)  | 26(6)  | 20(6)  |
| C(4)  | 82(11) | 82(11)  | 62(11)  | 36(9)  | 51(10) | 34(9)  |
| C(5)  | 43(8)  | 55(8)   | 30(7)   | 18(7)  | 10(6)  | 0(6)   |
| C(6)  | 72(11) | 78(11)  | 86(14)  | 36(11) | 39(11) | 13(9)  |
| C(7)  | 32(7)  | 48(8)   | 42(8)   | 6(7)   | -1(6)  | -3(6)  |
| C(8)  | 72(11) | 57(9)   | 53(10)  | 15(8)  | -4(8)  | 26(8)  |
| C(9)  | 42(12) | 33(9)   | 61(14)  | 0      | 29(11) | 0      |
| C(10) | 78(16) | 25(10)  | 83(18)  | 0      | 26(14) | 0      |
| C(11) | 54(9)  | 63(9)   | 51(9)   | 10(8)  | 25(8)  | -21(7) |
| C(12) | 63(10) | 115(14) | 18(7)   | 7(8)   | 8(7)   | 6(9)   |
| O(1)  | 46(5)  | 50(5)   | 49(6)   | 15(5)  | 19(5)  | -2(4)  |
| O(1W) | 58(6)  | 41(5)   | 44(6)   | -15(4) | 28(5)  | -19(4) |
| O(2W) | 42(5)  | 31(4)   | 34(5)   | 0(4)   | 14(4)  | 10(3)  |
| O(2)  | 45(5)  | 44(5)   | 39(5)   | 7(4)   | 9(4)   | -2(4)  |
| O(3)  | 73(7)  | 50(6)   | 68(7)   | 24(5)  | 45(6)  | 34(5)  |
| O(4)  | 56(5)  | 44(5)   | 43(5)   | 19(4)  | 31(5)  | 17(4)  |
| O(5)  | 53(5)  | 40(5)   | 39(5)   | 20(4)  | 20(5)  | 26(4)  |

|       |       |       |       |       |        |       |
|-------|-------|-------|-------|-------|--------|-------|
| O(6)  | 57(6) | 50(5) | 39(6) | -6(5) | 23(5)  | -8(4) |
| O(7)  | 56(6) | 61(6) | 34(5) | 21(5) | 28(5)  | 14(5) |
| O(8)  | 53(6) | 61(6) | 45(6) | 24(5) | 30(5)  | 27(5) |
| O(9)  | 43(5) | 31(5) | 46(6) | 0(4)  | -14(4) | -5(4) |
| O(10) | 41(5) | 31(5) | 66(7) | 2(4)  | 0(5)   | 5(4)  |
| O(11) | 52(6) | 55(6) | 58(7) | 12(5) | 21(5)  | 0(5)  |
| O(12) | 26(4) | 39(5) | 50(6) | -5(4) | 6(4)   | -4(4) |
| O(13) | 31(5) | 53(5) | 26(5) | 12(4) | 8(4)   | 1(4)  |

---

3. Figure S1 and S2: Polyhedral representation and Schematic depiction of crystal packing of **1**.

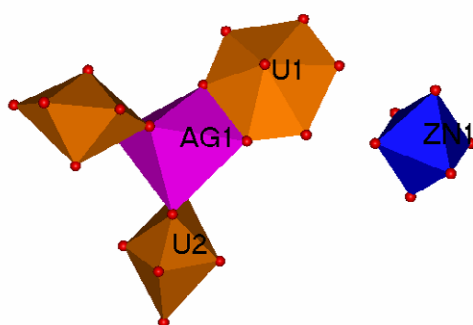

**Figure S1** Polyhedral representation showing only the atoms coordinated directly to U, Ag and Zn for clarity.

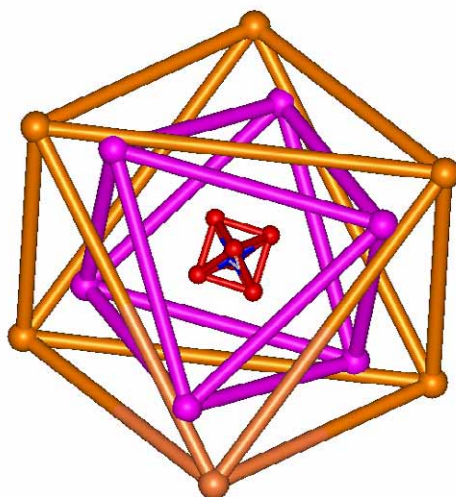

**Figure S2** Schematic depiction of crystal packing of **1**.

4. IR spectra of compound **1**(Figure S3)

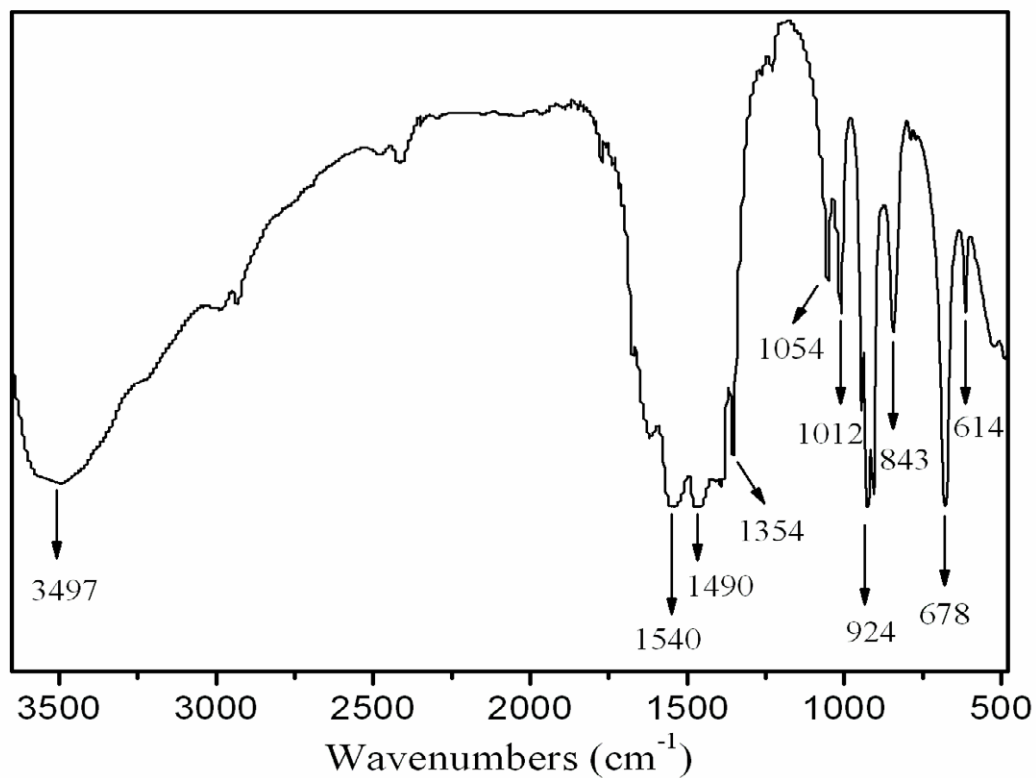

**Figure S3:** IR spectra of **1**. Note that the peaks at 3497, 1540, 1490 and 924  $\text{cm}^{-1}$ , ascribed to  $\nu(\text{OH})$ ,  $\nu_{\text{as}}(\text{COO})$ ,  $\nu_{\text{s}}(\text{COO})$  and  $\nu(\text{UO}_2^{2+})$  stretching absorptions of **1** respectively.

5.  $^1\text{H}$  NMR and  $^{13}\text{C}$  NMR of **1**(Figure S4 & S5)

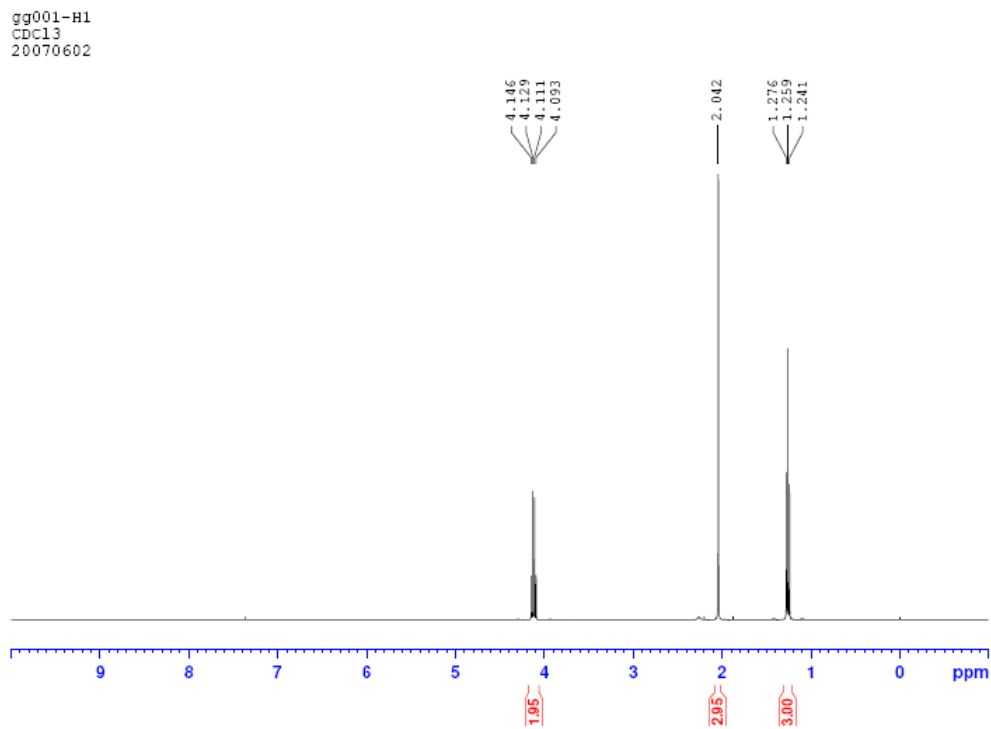

**Figure S4:**  $^1\text{H}$  NMR of **1**.  $\delta$  (ppm) = 4.13 (2H, m), 2.04(1H, s), 1.26(3H, t), respectively.

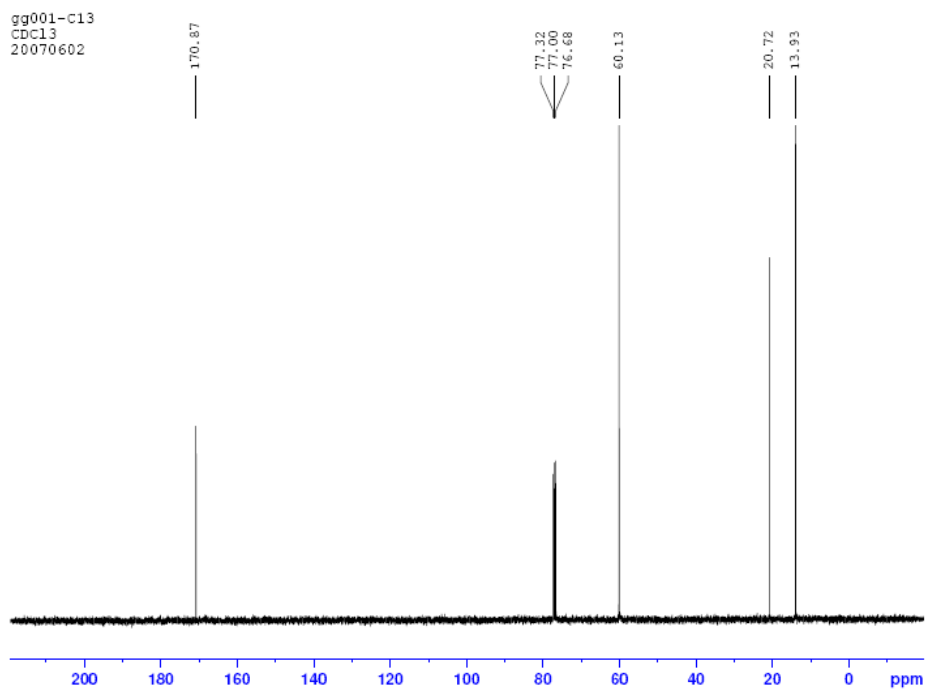

**Figure S5:**  $^{13}\text{C}$  NMR of **1**.  $\delta$  (ppm) = 13.93, 20.72, 60.13, 76.68, 77.00, 77.32, 170.87.



5. Powder XRD patterns of compound **1**(Figure S6)

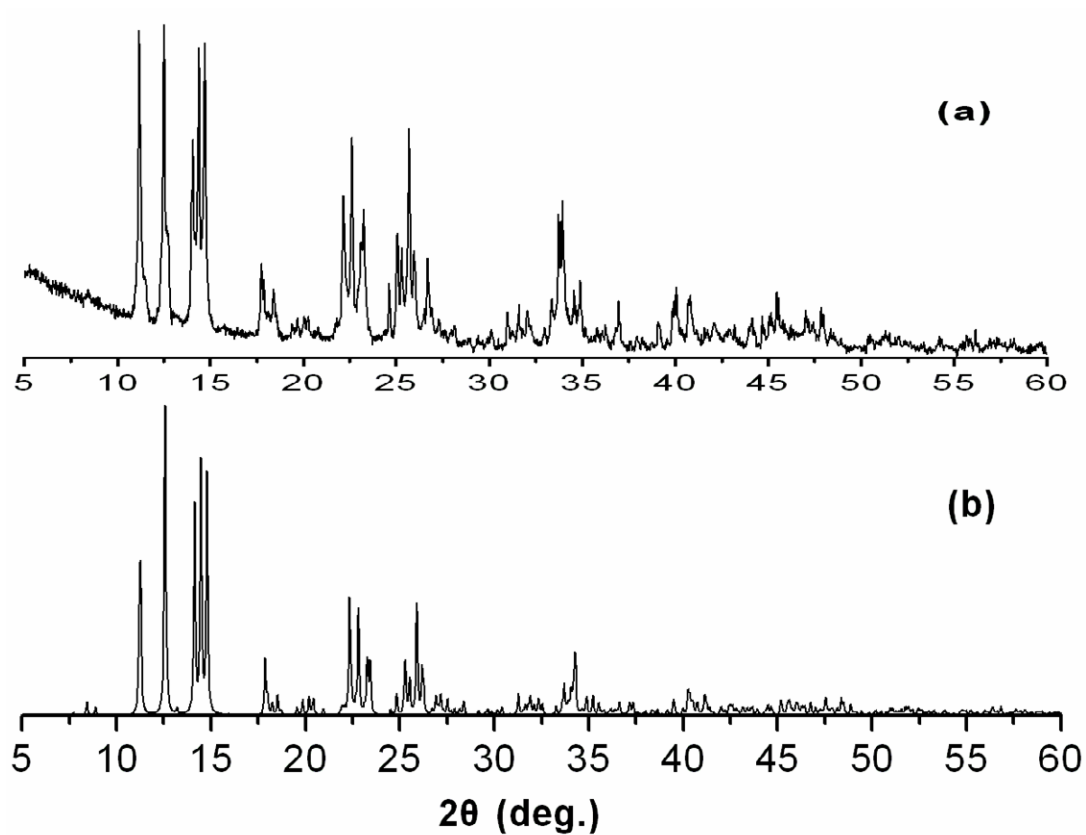

**Figure S6:** Powder XRD patterns of **1**: (a) Experimental powder X-ray diffraction pattern; (b) simulated from single crystal X-ray data.

7. Fluorescence excitation spectra and emission spectra of **1** in the solid state.

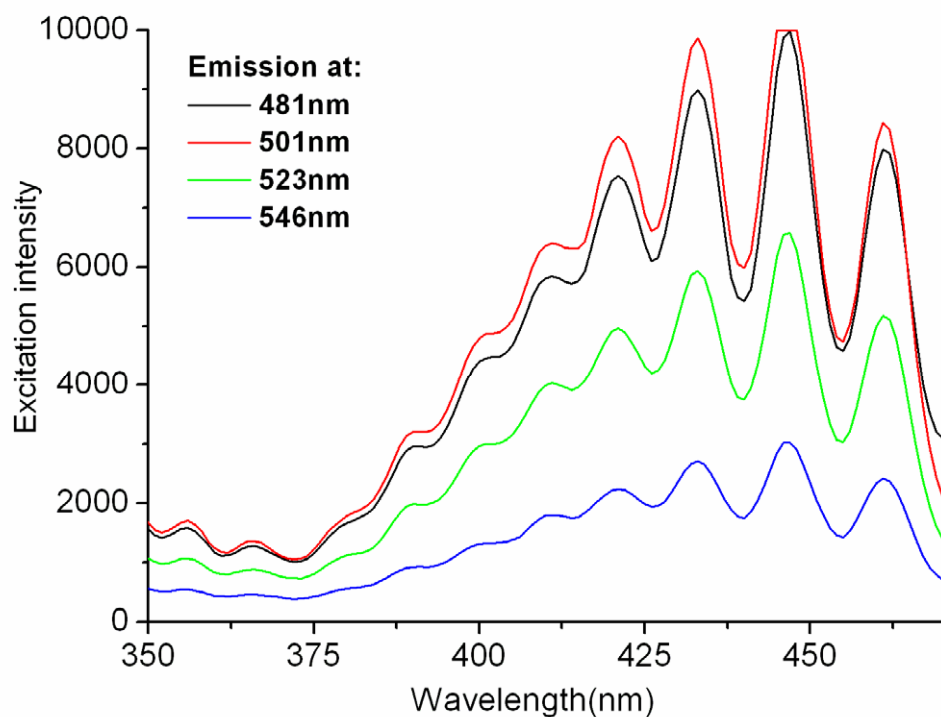

**Figure S7-1** Solid-state excitation spectra for **1** at different emission wavelengths at RT.

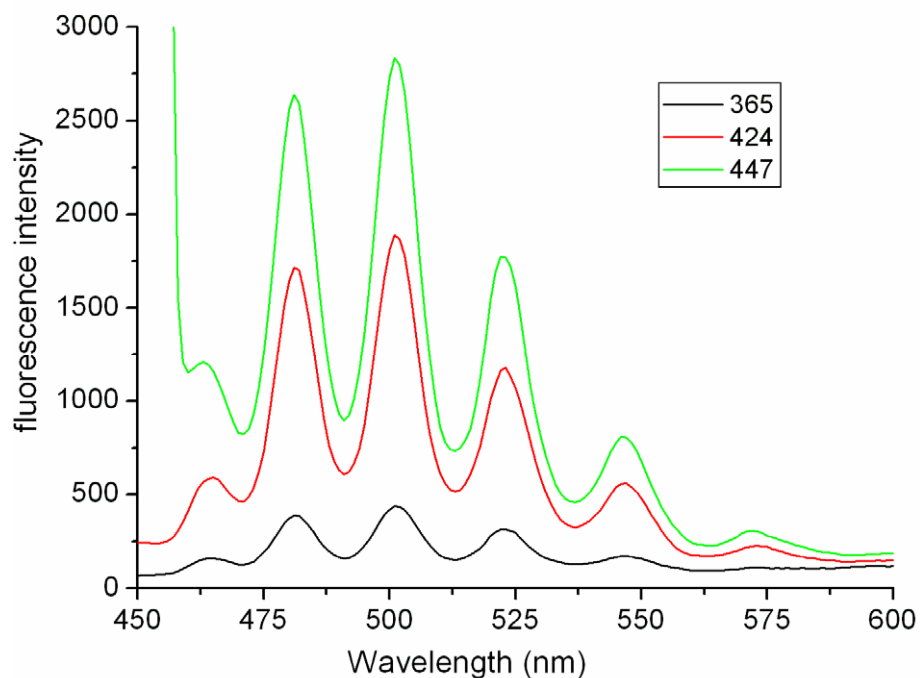

**Figure S7-2** Solid-state emission spectra for **1** at different excitation wavelengths at RT.
